# Supplementary material for: Comprehensive analysis of aberrantly expressed lncRNAs and construction of ceRNA network in gastric cancer
Source: PubMed Central journal article supplement (PMC5915079; doi:10.18632/oncotarget.24841), 2018-04-06
Supplement: oncotarget-09-18386-s001.pdf [file oncotarget-09-18386-s001.pdf]

## Comprehensive analysis of aberrantly expressed lncRNAs and construction of ceRNA network in gastric cancer

### SUPPLEMENTARY MATERIALS

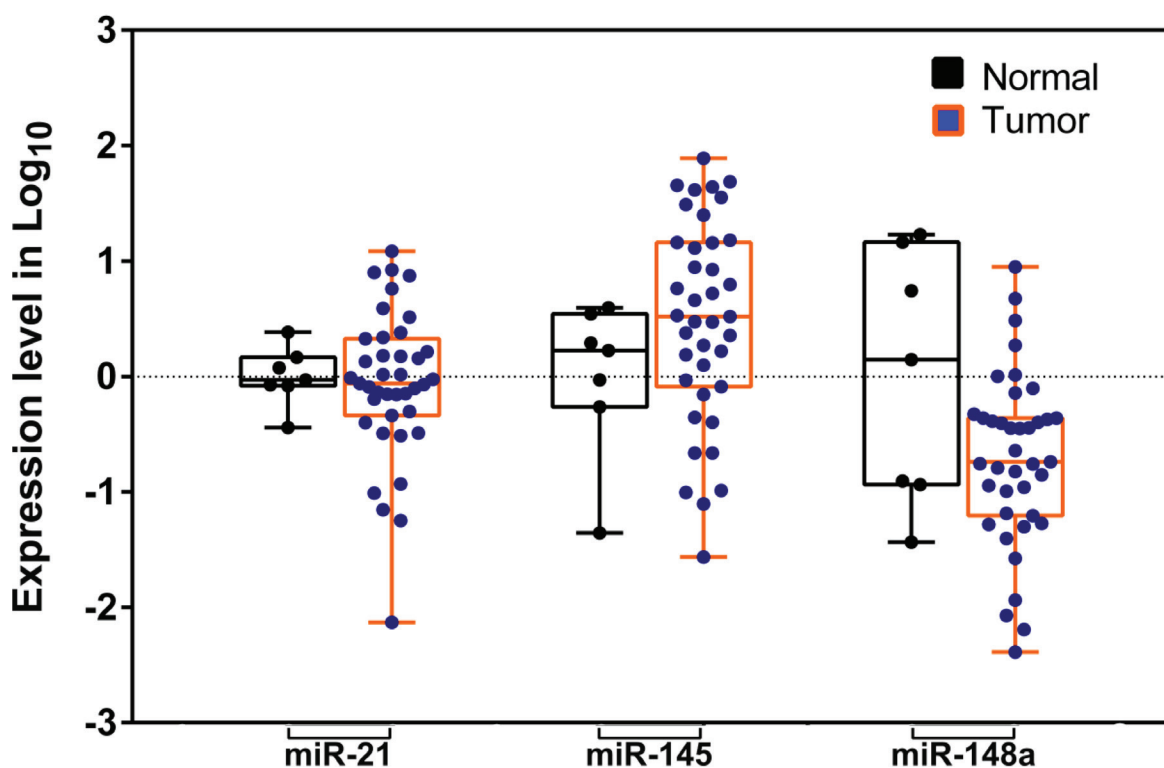

**Supplementary Figure 1: Expression levels of microRNAs those potentially involved in ceRNA network.** Expression levels of miR-21, miR-145 and miR-148a in 30 gastric tumors and adjacent normal tissues. miR-21 and miR-145 were overexpressed whereas miR-148a was downregulated in gastric tumor compared to normal tissue.

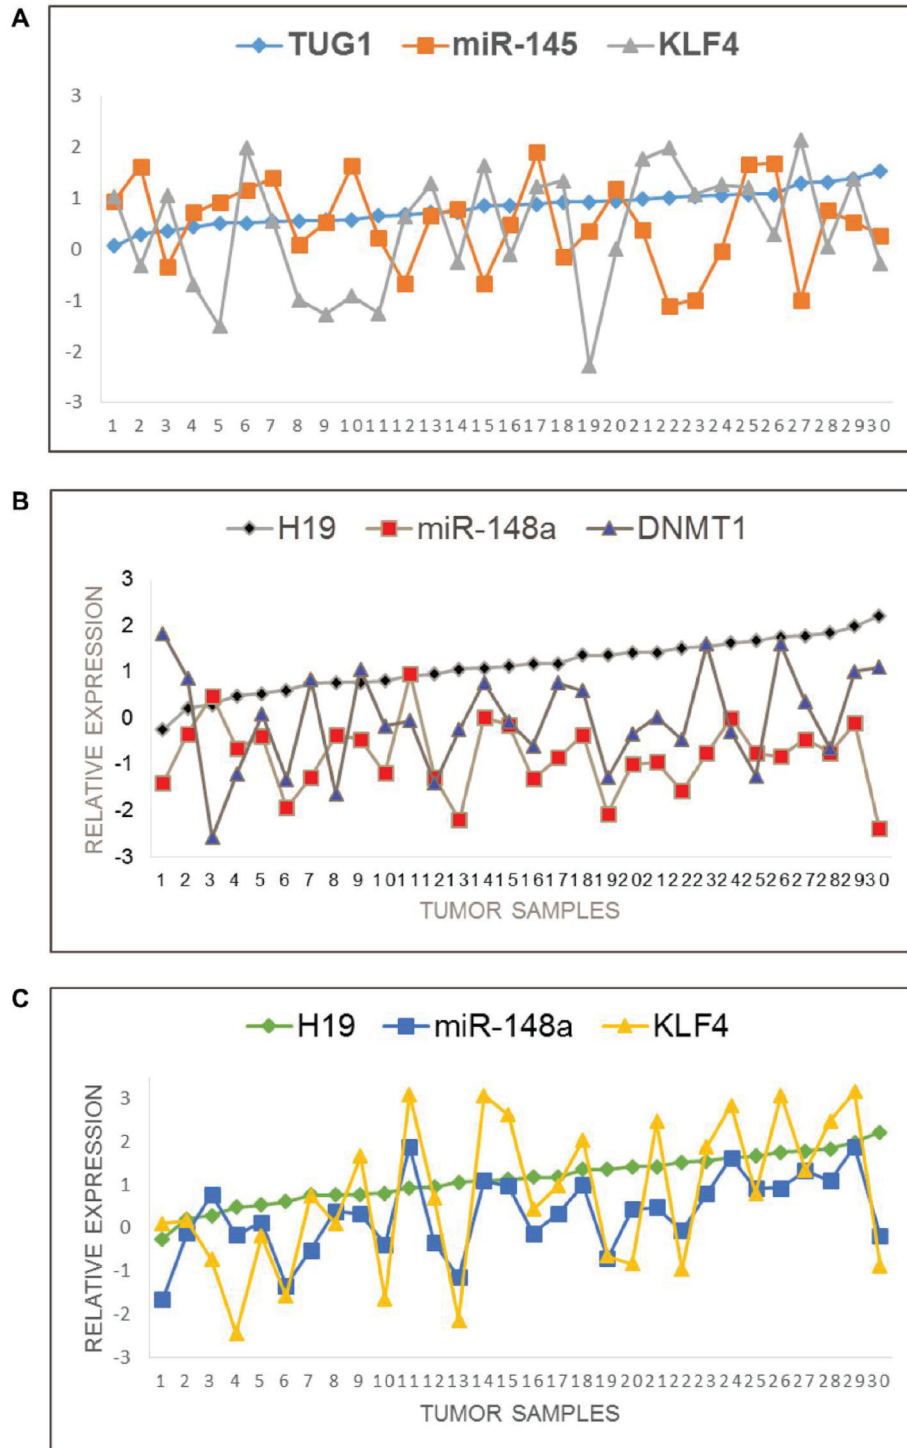

**Supplementary Figure 2: Comparative expression of lncRNA, miRNA and mRNAs involved in competing endogenous network in gastric cancer.** ceRNA network modulated by lncRNA TUG1 through sponging miR-145 which targets KLF4 mRNA (A). Similarly, ceRNA network exhibited by lncRNA H19 by absorbing miR-145 which targets DNMT1 and KLF4 in gastric tumors (B and C, respectively).

**Supplementary Table 1: List of lncRNAs reported in various human cancers**

| Candidate | Type of Cancer | Reference          | PMID     |
|-----------|----------------|--------------------|----------|
| H19       | Gastric        | Yang F (2012)      | 22776265 |
| HOTAIR    | Gastric        | Endo, H (2013)     | 24130837 |
| CCAT1     | Gastric        | Yang F (2013)      | 23143645 |
| GAS5      | Gastric        | Sun M (2014)       | 24884417 |
| MALAT1    | Gastric        | Okugawa Y (2014)   | 25280565 |
| MEG3      | Gastric        | Peng W (2015)      | 26253106 |
| UCA1      | Gastric        | Zheng Q (2015)     | 25903045 |
| POU3F3    | Gastric        | Xiong G (2015)     | 26807174 |
| TUG1      | Gastric        | Zhang E (2016)     | 26913601 |
| BC032469  | Gastric        | Lu M (2016)        | 26549025 |
| PTENP1-AS | Gastric        | Guo X (2016)       | 25968876 |
| PANDA     | Gastric        | Ma P (2016)        | 26898439 |
| NEAT1     | Gastric        | Fu J (2016)        | 27095450 |
| LINC00312 | Nasopharyngeal | Zhang W (2013)     | 23529758 |
| AP5M1     | Nasopharyngeal | Wang Q (2014)      | 24379026 |
| NBAT1     | Neuroblastoma  | Pandey G (2014)    | 25517750 |
| ZEB2-AS1  | Hepatocellular | Li T (2016)        | 27748842 |
| FALEC     | Prostate       | Zhao R (2017)      | 28585762 |
| LINROR    | Oral           | Arunkumar G (2017) | 28443494 |

**Supplementary Table 2: P-values of lncRNAs between tumor and normal**

| LncRNA    | P value | P value summary |
|-----------|---------|-----------------|
| H19       | <0.0001 | ****            |
| PTENP1-AS | <0.0001 | ****            |
| GAS5      | <0.0001 | ****            |
| MEG3      | <0.0001 | ****            |
| AP5M1     | <0.0001 | ****            |
| PANDA     | 0.0002  | ***             |
| TUG1      | 0.0009  | ***             |
| MALAT1    | 0.0116  | *               |
| CCAT1     | 0.2712  | ns              |
| LINC00312 | 0.3716  | ns              |
| NBAT1     | 0.9103  | ns              |
| HOTAIR    | 0.4699  | ns              |
| ZEB2-AS1  | 0.125   | ns              |
| BC032469  | 0.0578  | ns              |
| POU3F3    | 0.0578  | ns              |
| UCA1      | 0.0185  | *               |
| NEAT1     | 0.0208  | *               |
| FALEC     | 0.0013  | **              |
| LINCROR   | <0.0001 | ****            |

\*P value with statistical significance. \* $P < 0.05$ , \*\* $P < 0.01$ , \*\*\* $P < 0.001$  and \*\*\*\* $P < 0.0001$  vs. normal tissues.

**Supplementary Table 3: LncRNA expression in gastric cancer samples from TANRIC database**

| <b>Top 20 Overexpressed lncRNAs in gastric cancer</b> |                      |                     |
|-------------------------------------------------------|----------------------|---------------------|
| <b>ENSEMBL ID</b>                                     | <b>lncRNA</b>        | <b>Mean log2</b>    |
| ENSG00000269888.1                                     | lnc-OTOL1-5          | 7.111               |
| ENSG00000258486.2                                     | lnc-LRR1-1:1         | 6.462               |
| ENSG00000251562.3                                     | MALAT-1 <sup>s</sup> | 5.943               |
| ENSG00000262477.1                                     | lnc-MEP1B-2:1        | 5.369               |
| ENSG00000177410.8                                     | ZFAS1                | 5.311               |
| ENSG00000260032.1                                     | NORAD:3              | 4.697               |
| ENSG00000248223.1                                     | lnc-BASP1-1:1        | 4.457               |
| ENSG00000269972.1                                     | lnc-MORC2-1:1        | 4.120               |
| ENSG00000245910.4                                     | SNHG6:2              | 3.998               |
| ENSG00000175061.13                                    | LRRC75A-AS1:75       | 3.982               |
| ENSG00000269987.1                                     | lnc-MORC2-2:1        | 3.566               |
| ENSG00000226950.2                                     | DANCR:8              | 3.555               |
| ENSG00000225733.1                                     | FGD5-AS1:4           | 3.507               |
| ENSG00000269893.2                                     | SNHG8:2              | 3.395               |
| ENSG00000232388.2                                     | LINC00493:4          | 3.333               |
| ENSG00000240567.1                                     | lnc-OTOL1-1:1        | 3.295               |
| ENSG00000130600.11                                    | H19:14 <sup>s</sup>  | 3.287               |
| ENSG00000253352.4                                     | TUG1:19 <sup>s</sup> | 3.275               |
| ENSG00000203875.6                                     | SNHG5:4              | 3.223               |
| ENSG00000269900.2                                     | lnc-C9orf100-1:2     | 3.134               |
| <b>Remaining candidates of the study</b>              |                      |                     |
| ENSG00000234741                                       | GAS5                 | 2.712               |
| ENSG00000247844.1                                     | CCAT1                | -0.697              |
| ENSG00000214049.6                                     | UCA1                 | -0.793              |
| ENSG00000237697                                       | LINC312              | -1.616              |
| ENSG00000214548.10                                    | MEG3                 | -1.643              |
| ENSG00000228630.1                                     | HOTAIR               | -4.440              |
| ENSG00000228126.1                                     | FALEC                | -5.018              |
| ENSG00000249201.2                                     | BC032469             | -6.282 <sup>b</sup> |
| ENSG00000260455.1                                     | NBAT1                | -6.309              |
| ENSG00000238057.8                                     | ZEB2-AS1             | -7.720              |
| ENSG00000258609.1                                     | LINCORR              | -12.624             |
| ENSG00000228528.1                                     | POU3F3               | -15.575             |
| ENSG00000281128.1                                     | PTENP1-AS            | N/A                 |
| ENSG00000053770                                       | AP5M1                | N/A                 |
| ENSG00000281450.1                                     | PANDA                | N/A                 |
| ENSG00000245532.5                                     | NEAT1                | N/A                 |

<sup>s</sup>lncRNAs screened in present study listed in top 20 overexpressed lncRNAs in gastric cancer obtained using TANRIC database.

**Supplementary Table 4: Association of lncRNAs expression with tumor clinicopathological features**

| <b>LncRNA</b> | <b>Diffuse<br/>Vs.<br/>Intestinal</b> | <b>&lt; Stage<br/>II Vs.<br/>&gt; Stage II</b> | <b>&lt;T2<br/>Vs.<br/>&gt;T2</b> | <b>&lt;N2<br/>Vs.<br/>&gt;N2</b> | <b>Tobacco<br/>user Vs.<br/>Non-user</b> | <b>Alcoholic<br/>Vs.<br/>Non-<br/>alcoholic</b> | <b>Veg<br/>Vs.<br/>Non-Veg</b> |
|---------------|---------------------------------------|------------------------------------------------|----------------------------------|----------------------------------|------------------------------------------|-------------------------------------------------|--------------------------------|
| H19           | 0.9096                                | 0.8738                                         | 0.8450                           | 0.3739                           | 0.8553                                   | 0.6602                                          | 0.9337                         |
| PTENP1-AS     | 0.5861                                | 0.6022                                         | 0.9704                           | 0.6240                           | 0.7662                                   | 0.9736                                          | 0.1991                         |
| GAS5          | 0.3410                                | 0.2889                                         | 0.7507                           | 0.9489                           | 0.5867                                   | 0.7790                                          | 0.5980                         |
| MEG3          | 0.9999                                | 0.9090                                         | 0.6309                           | 0.3083                           | 0.7977                                   | 0.9736                                          | 0.0863                         |
| TUG1          | 0.7424                                | 0.9736                                         | 0.6872                           | 0.7153                           | 0.3822                                   | 0.4659                                          | 0.0946                         |
| AP5M1         | 0.9779                                | 0.2798                                         | 0.4057                           | 0.9489                           | 0.7662                                   | 0.7790                                          | 0.0786                         |
| PANDA         | 0.7101                                | 0.8780                                         | 0.5182                           | 0.7625                           | 0.7662                                   | 0.9736                                          | 0.4368                         |
| MALAT1        | 0.9437                                | 0.9381                                         | 0.6872                           | 0.8107                           | 0.2983                                   | 0.4173                                          | 0.0587                         |
| CCAT1         | 0.9999                                | 0.2615                                         | 0.1446                           | 0.6690                           | 0.5047                                   | 0.9704                                          | 0.1991                         |
| LINC312       | 0.9437                                | 0.6899                                         | 0.8450                           | 0.9989                           | 0.5867                                   | 0.9704                                          | 0.4619                         |
| NBAT1         | 0.6643                                | 0.9999                                         | 0.4413                           | 0.5693                           | 0.7977                                   | 0.8769                                          | 0.4125                         |
| HOTAIR        | 0.8418                                | 0.8133                                         | 0.6283                           | 0.9989                           | 0.4052                                   | 0.6872                                          | 0.1578                         |
| ZEB2-AS1      | 0.9437                                | 0.8419                                         | 0.6283                           | 0.8495                           | 0.8234                                   | 0.7202                                          | 0.2475                         |
| BC032469      | 0.0672                                | 0.7819                                         | 0.6309                           | 0.7625                           | 0.3822                                   | 0.6872                                          | 0.0786                         |
| POU3F3        | 0.8083                                | 0.8627                                         | 0.4058                           | 0.9585                           | 0.1823                                   | 0.4913                                          | 0.0430 <sup>#</sup>            |
| UCA1          | 0.7424                                | 0.8627                                         | 0.1001                           | 0.4578                           | 0.7917                                   | 0.9736                                          | 0.3890                         |
| NEAT1         | 0.9617                                | 0.9090                                         | 0.7790                           | 0.8107                           | 0.6989                                   | 0.8769                                          | 0.4125                         |
| FALEC         | 0.5861                                | 0.8769                                         | 0.6872                           | 0.8990                           | 0.7351                                   | 0.9381                                          | 0.3663                         |
| LINCRR        | 0.4209                                | 0.6602                                         | 0.8450                           | 0.5801                           | 0.8294                                   | 0.7790                                          | 0.5143                         |

<sup>#</sup>*P* value with statistical significance.

**Supplementary Table 5: Clinical association of LncRNAs from TANRIC database**

| lncRNAs   | Lauren              | Tumor stage         | Survival            |                          | Correlation |                |                     |
|-----------|---------------------|---------------------|---------------------|--------------------------|-------------|----------------|---------------------|
|           |                     |                     | Cox- <i>P</i> value | log Rank <i>P</i> -Value | miRNA       | r <sup>2</sup> | <i>P</i> -value     |
| HOTAIR    | 0.5976              | 0.0996              | 0.0380 <sup>#</sup> | 0.1350                   | miR-196b    | 0.56           | 0.0000              |
| GAS5      | 0.0000              | 0.1861              | 0.4187              | 0.9685                   | miR-17      | 0.52           | 0.0000              |
| LINC00312 | 0.3763              | 0.2725              | 0.5632              | 0.1730                   | miR-215     | 0.47           | 0.0000              |
| CCAT1     | 0.0009 <sup>#</sup> | 0.6535              | 0.8358              | 0.5842                   | miR-584     | 0.42           | 0.0001 <sup>#</sup> |
| ZEB2-AS1  | 0.0035 <sup>#</sup> | 0.1824              | 0.8985              | 0.3090                   | miR-200b    | -0.48          | 0.0000              |
| TUG1      | 0.0003 <sup>#</sup> | 0.7647              | 0.4229              | 0.9638                   | miR-1538    | -0.46          | 0.0000              |
| H19       | 0.7261              | 0.0021 <sup>#</sup> | 0.8494              | 0.6681                   | miR-148a    | -0.41          | 0.0002 <sup>#</sup> |
| MEG3      | 0.0002 <sup>#</sup> | 0.0249 <sup>#</sup> | 0.8222              | 0.8849                   | miR-148a    | -0.41          | 0.0002 <sup>#</sup> |
| LINCOROR  | 0.1062              | 0.4012              | 0.8090              | 0.8347                   | miR-1185-1  | -0.40          | 0.0002 <sup>#</sup> |
| MALAT1    | 0.1254              | 0.0270 <sup>#</sup> | 0.9699              | 0.2557                   | n/a         | n/a            | n/a                 |
| NEAT1     | 0.0595              | 0.1186              | 0.7438              | 0.5063                   | n/a         | n/a            | n/a                 |
| UCA1      | 0.0000              | 0.2404              | 0.6247              | 0.8134                   | n/a         | n/a            | n/a                 |

<sup>#</sup>*P* value with statistical significance.

**Supplementary Table 6: LncRNAs targeted by miRNA by LncBase experimental v.2**

| <b>NCBI ID</b> | <b>LncRNA Name</b> | <b>miRNA name</b> | <b>Method</b> | <b>Score</b> |
|----------------|--------------------|-------------------|---------------|--------------|
| NR_002196.1    | H19                | miR-148a-3p       | IP            | 0.657        |
| NR_103745.2    | PTENP1-AS          | miR-21-5p         | RS            | –            |
| NR_002578.2    | GAS5               | miR-21-5p         | qPCR          | 0.382        |
|                |                    | miR-148a-3p       | IP            | 0.506        |
| NR_002766.2    | MEG3               | miR-145-5p        | IP            | 0.771        |
|                |                    | miR-148a-3p       | IP            | 0.597        |
|                |                    | miR-21-5p         | IP            | 0.68         |
| NR_110492.1    | TUG1               | miR-145-5p        | IP            | 0.959        |
|                |                    | miR-148a-3p       | IP            | 0.676        |
|                |                    | miR-21-5p         | IP            | 0.611        |
| NR_002819.2    | MALAT-1            | miR-145-5p        | IP            | 0.519        |
|                |                    | miR-148a-3p       | IP            | 0.551        |
|                |                    | miR-21-5p         | IP            | 0.406        |
| NR_028272.1    | NEAT1              | miR-145-5p        | IP            | 0.649        |
|                |                    | miR-148a-3p       | IP            | 0.796        |
| NR_048536.1    | LINC-ROR           | miR-145-5p        | qPCR          | 0.585        |

**Supplement Table 7: LncRNAs targeted by miRNA by MiRanda tool**

| <b>microRNA interaction with LncRNA</b>                           | <b>mirSVR score</b> |
|-------------------------------------------------------------------|---------------------|
| 3' ucCCUAAGGACCCUUUUGACCUg 5' hsa-miR-145<br>                     | 0.8960              |
| 1749:5' gaGGAU--GUGAAAAAACUGGAa 3' <b>PTENP1</b>                  |                     |
| 3' ucccuaaGGAC--CCUUUUGACCUg 5' hsa-miR-145<br>                   | -0.2663             |
| 452:5' guguucaCCUGCUAGCAAACUGGAg 3' <b>MEG3</b>                   |                     |
| 3' ucccuaggaccUUUUGACCUg 5' hsa-miR-145<br>                       | -0.1244             |
| 1744:5' ggagggaaaaaACAACUGGAa 3' <b>TUG1</b>                      |                     |
| 3' ucccuaggacCCUUUUGACCUg 5' hsa-miR-145<br>                      | -0.0110             |
| 1888:5' aaguugaaguGAAAACUGGAa 3' <b>MALAT1</b>                    |                     |
| 3' uguUCAAGACAUCACGUGACu 5' hsa-miR-148a<br>                      | -0.9028             |
| 311:5' acuAAG-UCAUU--UGCACUGg 3' <b>H19</b>                       |                     |
| 3' uguuuccaagACAUCACGUGACu 5' hsa-miR-148a<br>                    | -0.0699             |
| 4474:5' cuacucgaaUG-AAUGCACUGg 3' <b>TUG1</b>                     |                     |
| 3' uguuuccaagacaucaCGUGACu 5' hsa-miR-148a<br>                    | -0.0004             |
| 2033:5' caagcacuaccaccaGCACUGu 3' <b>TUG1</b>                     |                     |
| 3' uguuuccaagacaucaCGUGACu 5' hsa-miR-148a<br>                    | -0.0014             |
| 2203:5' aaauuggauaaaaaGCACUGa 3' <b>MALAT1</b>                    |                     |
| 3' ggggagGGUCGGAGGGACGGu 5' hsa-miR-1207-5p<br>  : :              | -0.0239             |
| 47:5' cgugggCUGGAC-CCCUGCCc 3' <b>MEG3</b>                        |                     |
| 3' ggggagggucggagGGACGGu 5' hsa-miR-1207-5p<br>                   | -0.0155             |
| 865:5' cucaucucuuaagaCCUGCCg 3' <b>UCA1</b>                       |                     |
| 3' ggggAGGG-UCGGAGGGACGGu 5' hsa-miR-1207-5p<br>    : :           | -0.5985             |
| 267:5' cuggUCCUGGGUCACCCUGCCa 3' <b>MUDENG</b>                    |                     |
| 3' aguuguaGUCAGACUAU-UCGAu 5' hsa-miR-21<br>:                     | -0.5634             |
| 137:5' guguuugUAGUCUGAUAGAGCUu 3' <b>MUDENG</b>                   |                     |
| 3' aguugaugacagacuAUUCGAu 5' hsa-miR-21<br>                       | -0.0531             |
| 451:5' uccaaaucuaaguacUAAGCUc 3' <b>MUDENG</b>                    |                     |
| 3' agUUGUAGUCAGACUAUUCGAu 5' hsa-miR-21<br>  : :   :   :          | -0.0866             |
| 559:5' aaAGUGUUUAAAUAGUAAGCUg 3' <b>MUDENG</b>                    |                     |
| 3' agUUGUAGUCAGA---CUAUUCGAu 5' hsa-miR-21<br>  : :   :     :   : | -0.0626             |
| 656:5' cuAGAGUUAGUUUUUAAGUAAGCUu 3' <b>MUDENG</b>                 |                     |



|                                               |  |         |
|-----------------------------------------------|--|---------|
| 3' aguuguagucagacuAUUCGAu 5' hsa-miR-21       |  | -0.0689 |
| 895:5' guagagaucauuUAAGCUu 3' <b>MUDENG</b>   |  |         |
| 3' aguUGUAGUCAGACUAUUCGAu 5' hsa-miR-21       |  | -0.0828 |
| 3752:5' gauAAAUGAG-CUAAUAAGCUu 3' <b>TUG1</b> |  |         |
| 3' aguuguagucagacuAUUCGAu 5' hsa-miR-21       |  | -0.0019 |
| 6630:5' gauccaaguauuuauUAAGCUa 3' <b>TUG1</b> |  |         |
| 3' aguuguagucagacuAUUCGAu 5' hsa-miR-21       |  | -0.0017 |
| 6100:5' uucuaagcagagauUAAGCUu 3' <b>TUG1</b>  |  |         |

---

**Supplementary Table 8: mRNAs targeted by miRNA by MiRanda tool**

| MicroRNA interaction with mRNA                    | mirSVR score |
|---------------------------------------------------|--------------|
| 3' uccuaaggacccuuUUGACCUg 5' hsa-miR-145          | -0.2628      |
| 915:5' gucaacgcaacgucuAACUGGAc 3' <b>FGFR2</b>    |              |
| 3' uccuaaggacccuuUUGACCUg 5' hsa-miR-145          | -0.0222      |
| 190:5' acagaugggucuguGACUGGAu 3' <b>KLF4</b>      |              |
| 3' ucccUAAGG--ACCCUUUUGACCUg 5' hsa-miR-145       | -0.0520      |
| 260:5' caaaAUGCCAAGGGGGUGACUGGAa 3' <b>KLF4</b>   |              |
| 3' uccuaaggacccuuUGACCUg 5' hsa-miR-145           | -0.0605      |
| 209:5' uuauuuuucugaucACUGGAc 3' <b>EIF2C4</b>     |              |
| 3' ugUUUCAAGACAUCACGUGACu 5' hsa-miR-148a         | -1.0910      |
| 643:5' agACAG-UCUGUUAUGCACUGu 3' <b>KLF4</b>      |              |
| 3' uguuuaagacaucACGUGACu 5' hsa-miR-148a          | -1.0394      |
| 34:5' aggaaucccaacaUGCACUGa 3' <b>DNMT1</b>       |              |
| 3' uguuUCAAGAC--AUC-ACGUGACu 5' hsa-miR-148a      | -0.7046      |
| 110:5' cagcAGCUCGGAAUAGUUGCACUGa 3' <b>EIF2C4</b> |              |
| 3' uguuuaagacaucCGUGACu 5' hsa-miR-148a           | -0.0117      |
| 134:5' aaucuauacuugcaGCACUGu 3' <b>EIF2C4</b>     |              |
| 3' uguuucAAGACAUCACGUGACu 5' hsa-miR-148a         | -0.8675      |
| 208:5' auuauUUUUCUGAUGCACUGg 3' <b>EIF2C4</b>     |              |
| 3' uguuuaagacaucCGUGACu 5' hsa-miR-148a           | -0.0856      |
| 1768:5' uccagcaauauaaaGCACUGu 3' <b>EIF2C4</b>    |              |

|                                                   |         |         |
|---------------------------------------------------|---------|---------|
| 3' uguuucaagacaucaCGUGACu 5' hsa-miR-148a         |         | -0.0012 |
| 18:5' ucccacaacaggacaGCACUGg 3' <b>FGFR2</b>      |         |         |
| 3' aguUGUAGUCAGA--CUAUUCGAu 5' hsa-miR-21         | : :   : | -1.0566 |
| 1082:5' gucACUUUGUUUUAAAAUAAGCUa 3' <b>EIF2C4</b> |         |         |
| 3' aguuguagucagacuAUUCGAu 5' hsa-miR-21           |         | -0.0070 |
| 1912:5' aggccuguugcucAUUAAGCUg 3' <b>EIF2C4</b>   |         |         |

“Good” mirSVR score refers to miRNA targets with <-0.1 score, and “non-good” mirSVR score refers to targets with >-0.1 score obtained from the support vector regression algorithm mirSVR.

**Supplementary Table 9: lncRNAs targeted by miRNA from Starbase**

| miRNA       | lncRNA | Cancers Num | Target site                                                                                                         |
|-------------|--------|-------------|---------------------------------------------------------------------------------------------------------------------|
| miR-21-5p   | TUG1   | 4           | miRNA 3'-agtTGTAGTCAGACTATTCGAt-5'<br>                                 <br>ncRNA 5'-gatAAATGAG-CTAATAAGCTt-3'       |
| miR-145-5p  | TUG1   | 2           | miRNA 3'-tccctaaggaccTTTTGACCTg-5'<br>                                 <br>ncRNA 5'-ggagggaaaaaaACAACCTGGAa-3'      |
| miR-145-5p  | MALAT1 | 2           | miRNA 3'-tccctaaggacCCTTTTGACCTg-5'<br>                                 <br>ncRNA 5'-aagtttgaagtGGAAAACCTGGAa-3'    |
| miR-148a-3p | H19    | 7           | miRNA 3'-tgtTCAAGACATCACGTGACT-5'<br>                                 <br>ncRNA 5'-actAAG-TCATT--TGCACTGg-3'        |
| miR-148a-3p | HOTAIR | 3           | miRNA 3'-tgtttcAAGACATCACGTGACT-5'<br>  :                                  <br>ncRNA 5'-gatgcaTTTTCT-GTGCCTGg-3'    |
| miR-148a-3p | CCAT1  | N/A         | miRNA 3'-tgtttcaAGACATC-ACGTGACT-5'<br>  :                                  <br>ncRNA 5'-catcgacTTTGAAGTTGCACTGa-3' |

**Supplementary Table 10: Validated targeting miRNAs from miRTarBase**

| <b>Genes</b> | <b>Targeting miRNAs</b>                                                                                                                                                                                                                                                                                                                                                                        |
|--------------|------------------------------------------------------------------------------------------------------------------------------------------------------------------------------------------------------------------------------------------------------------------------------------------------------------------------------------------------------------------------------------------------|
| DNMT1        | miR-148a-3p,miR-29b-3p,miR-152-3p,miR-301b-3p,miR-126-3p,miR-342-3p,miR-185-5p,miR-140-5p,miR-193b-3p,miR-148b-3p,miR-155-5p,miR-877-3p,miR-484,miR-149-5p,miR-30b-5p,miR-100-5p,miR-26a-5p,miR-1260b,miR-200a-3p,miR-200b-3p,miR-429,miR-29a-3p,miR-92a-3p,miR-20a-5p,miR-19b-3p,miR-19a-3p,miR-18a-5p,miR-17-5p,let-7c-5p,miR-218-5p                                                         |
| AGO4         | miR-21-5p,miR-335-5p,miR-155-5p,miR-484,miR-92a-3p,miR-20a-5p,miR-33a-3p,miR-548a-5p,miR-15a-5p,miR-16-5p,miR-15b-5p,miR-195-5p,miR-424-5p,miR-497-5p,miR-545-3p,miR-3121-3p,miR-6079,miR-6828-5p,miR-6838-5p,miR-137,miR-6071,miR-192-3p,miR-6828-3p,miR-582-5p,miR-671-5p,miR-6782-3p,miR-144-3p,miR-101-3p,miR-6507-5p,miR-3692-5p,miR-93-3p,miR-129-5p,miR-6832-3p,miR-6834-3p,miR-513b-3p |
| KLF4         | miR-145-5p,miR-10b-5p,miR-25-3p,miR-135b-5p,miR-130a-3p,miR-663a,miR-103a-3p,miR-107,miR-335-5p,miR-128-3p,miR-124-3p,miR-30b-5p,miR-29a-3p,miR-15a-5p,miR-624-3p,miR-34a-5p,miR-7-5p,miR-137,miR-152-3p,miR-206                                                                                                                                                                               |
| EGFR         | miR-145-5p,miR-21-5p,miR-1-3p,miR-16-5p,miR-7-5p,miR-128-3p,miR-146a-5p,miR-542-5p,miR-128b,miR-133a-3p,miR-133b,miR-27a-3p,miR-335-5p,miR-155-5p,miR-30a-5p,let-7a-5p,miR-301b-3p,miR-574-3p,miR-219a-5p,miR-302b-3p,miR-125a-5p,miR-218-5p                                                                                                                                                   |
| FGFR2        | miR-19b-1-5p, miR-125b-5p, miR-1-3p, miR-186-5p                                                                                                                                                                                                                                                                                                                                                |

miRNAs presented in bold fonts are having common MREs with the target genes and the lncRNAs screened in the present study.

**Supplementary Table 11: mRNAs targeted by miRNA by DIANA tools, TargetScan, miRTarBase**

| NCBI ID        | mRNA  | miRNA                 |
|----------------|-------|-----------------------|
| NM_001130823.2 | DNMT1 | miR-148a-3p           |
| NM_017629.3    | AGO4  | miR-21-5p             |
| NM_001314052.1 | KLF4  | miR-145-5p            |
| NM_005228.3    | EGFR  | miR-21-5p, miR-145-5p |
| NM_000141.4    | FGFR2 | miR-125b-5p           |

**Supplementary Table 12: mRNAs targeted by miRNA from Starbase**

| NCBI ID        | mRNA  | miRNA                                |
|----------------|-------|--------------------------------------|
| NM_001130823.2 | DNMT1 | miR-148a-3p                          |
| NM_017629.3    | AGO4  | N/A                                  |
| NM_001314052.1 | KLF4  | miR-148a-3p, miR-148b-3p, miR-145-5p |
| NM_005228.3    | EGFR  | miR-148a-3p, miR-148b-3p             |
| NM_000141.4    | FGFR2 | miR-145-5p                           |

**Supplementary Table 13: mRNAs targeted by miRNA from ceRDB**

| NCBI ID        | mRNA            | miRNA name       |
|----------------|-----------------|------------------|
| NM_001130823.2 | DNMT1           | miR-148          |
| NM_017629.3    | AGO4 (or)EIF2C4 | miR-21, miR-148  |
| NM_001314052.1 | KLF4            | miR-145, miR-148 |
| NM_005228.3    | EGFR            | N/A              |
| NM_000141.4    | FGFR2           | N/A              |

**Supplementary Table 14: miRNA targeting both lncRNA-mRNA from LncACTdb**

| lncRNA<br>Ensembl ID | lncRNA | miRNA name   | gene<br>Ensembl ID | gene name |
|----------------------|--------|--------------|--------------------|-----------|
| ENSG00000130600      | H19    |              |                    |           |
| ENSG00000253352      | TUG1   | hsa-miR-148a | ENSG00000130816    | DNMT1     |
| ENSG00000251562      | MALAT1 |              |                    |           |
| ENSG00000245532      | NEAT1  |              |                    |           |
| ENSG00000130600      | H19    |              |                    |           |
| ENSG00000214548      | MEG3   |              |                    |           |
| ENSG00000253352      | TUG1   | hsa-let-7a   | ENSG00000134698    | EIF2C4    |
| ENSG00000251562      | MALAT1 |              |                    |           |
| ENSG00000245532      | NEAT1  |              |                    |           |
| ENSG00000130600      | H19    |              |                    |           |
| ENSG00000253352      | TUG1   | hsa-miR-145  | ENSG00000136826    | KLF4      |
| ENSG00000251562      | MALAT1 |              |                    |           |
| ENSG00000245532      | NEAT1  |              |                    |           |

|                 |        |            |                 |       |
|-----------------|--------|------------|-----------------|-------|
| ENSG00000130600 | H19    |            |                 |       |
| ENSG00000253352 | TUG1   | hsa-miR-21 | ENSG00000146648 | EGFR  |
| ENSG00000251562 | MALAT1 |            |                 |       |
| N/A             | N/A    | N/A        | N/A             | FGFR2 |

**Supplementary Table 15: miRNA targeting both lncRNA-mRNA by miRSponge**

| Sponge Type | Sponge Name | mRNA             | miRNA name | Reference (PMID) |
|-------------|-------------|------------------|------------|------------------|
| Coding-mRNA | DNMT1       | n/a              | miR-148a   | 24714841         |
| Host gene   | H19         | TGFB1            | miR-675    | 24988946         |
| Host gene   | H19         | RUNX1/ Smad/cdc6 | miR-675    | 24532688         |
| Pseudogene  | PTENP1      | PTEN             | miR-21     | 20577206         |
| LncRNA      | GAS5        | n/a              | miR-21     | 23933812         |
| LncRNA      | lincRNA-RoR | OCT4/Nanog/Sox2  | miR-145    | 23541921         |
| LncRNA      | lincRNA-RoR | n/a              | miR-145    | 24589415         |

**Supplementary Table 16: Statistical summary of miRNA expression**

**(a) P-values of gastric cancer associated miRNAs between tumor and normal**

| miRNA    | P value | P value summary |
|----------|---------|-----------------|
| miR-21   | 0.7875  | ns              |
| miR-145  | 0.1659  | ns              |
| miR-148a | 0.1537  | ns              |

**(b) Association of MRE shared miRNAs expression with tumor clinicopathological features**

| miRNA    | Diffuse<br>Vs.<br>Intestinal | < Stage II<br>Vs.<br>> Stage II | <T2<br>Vs.<br>>T2 | <N2<br>Vs.<br>>N2 | Tobacco user<br>Vs.<br>Non-user | Alcoholic<br>Vs.<br>Non-<br>alcoholic | Veg<br>Vs.<br>Non-Veg |
|----------|------------------------------|---------------------------------|-------------------|-------------------|---------------------------------|---------------------------------------|-----------------------|
| miR-21   | 0.9425                       | 0.1097                          | 0.2551            | 0.1463            | 0.9587                          | 0.7819                                | 0.1685                |
| miR-145  | 0.2187                       | 0.0171#                         | 0.0245#           | 0.0455#           | 0.5867                          | 0.9059                                | 0.5904                |
| miR-148a | 0.3311                       | 0.9381                          | 0.4659            | 0.5801            | 0.5540                          | 0.0470#                               | 0.9009                |

#P value with statistical significance.

**Supplementary Table 17: Statistical summary of mRNA expression****(a) P-values of gastric cancer associated mRNAs between tumor and normal**

| mRNA  | P value | P value summary |
|-------|---------|-----------------|
| DNMT1 | 0.8078  | ns              |
| AGO4  | 0.612   | ns              |
| KLF4  | 0.0803  | ns              |
| EGFR  | 0.1981  | ns              |
| FGFR2 | 0.0449  | *               |

\*P value with statistical significance.

**(b) Association of gastric cancer related mRNAs expression with tumor clinicopathological features**

|       | Diffuse<br>Vs.<br>Intestinal | < Stage II<br>Vs.<br>> Stage II | <T2<br>Vs.<br>>T2 | <N2<br>Vs.<br>>N2 | Tobacco<br>user<br>Vs.<br>Non-user | Alcoholic<br>Vs.<br>Non-<br>alcoholic | Veg<br>Vs.<br>Non-Veg |
|-------|------------------------------|---------------------------------|-------------------|-------------------|------------------------------------|---------------------------------------|-----------------------|
| DNMT1 | 0.2187                       | 0.5174                          | 0.6872            | 0.9089            | 0.3181                             | 0.7174                                | 0.5075                |
| AGO4  | 0.9194                       | 0.9413                          | 0.9090            | 0.6132            | 0.5818                             | 0.3517                                | 0.4309                |
| KLF4  | 0.9425                       | 0.6283                          | 0.7480            | 0.6132            | 0.7045                             | 0.8450                                | 0.9432                |
| EGFR  | 0.6411                       | 0.4173                          | 0.5174            | 0.8990            | 0.7604                             | 0.3959                                | 0.8776                |
| FGFR2 | 0.9999                       | 0.4680                          | 0.4192            | 0.4578            | 0.9261                             | 0.5174                                | 0.5621                |

**Supplementary Table 18: LncRNA-mRNA spearman correlation****Spearman correlation P-values**

| Genes     | DNMT1  | AGO4    | KLF4    | EGFR    | FGFR2   |
|-----------|--------|---------|---------|---------|---------|
| H19       | 0.4228 | 0.8181  | 0.2486  | 0.4269  | 0.4119  |
| PTENP1-AS | 0.9637 | 0.2048  | 0.0258# | 0.0088# | 0.2839  |
| GAS5      | 0.5111 | 0.3187  | 0.1144  | 0.5157  | 0.2849  |
| MEG3      | 0.6225 | 0.4536  | 0.0450# | 0.0557  | 0.2849  |
| TUG1      | 0.6459 | 0.3972  | 0.0506  | 0.0342# | 0.5624  |
| AP5M1     | 0.4608 | 0.7623  | 0.2506  | 0.2576  | 0.8859  |
| PANDA     | 0.9358 | 0.1806  | 0.0249# | 0.0058# | 0.4325  |
| MALAT1    | 0.6077 | 0.0497# | 0.0025# | 0.0043# | 0.1313  |
| CCAT1     | 0.6955 | 0.4451  | 0.2785  | 0.1629  | 0.5341  |
| LINC312   | 0.2796 | 0.3474  | 0.1592  | 0.2970  | 0.8290  |
| NBAT1     | 0.9581 | 0.5172  | 0.1155  | 0.0509  | 0.7481  |
| HOTAIR    | 0.6578 | 0.1759  | 0.0347  | 0.0136  | 0.7445  |
| ZEB2-AS1  | 0.9507 | 0.5545  | 0.0239  | 0.0152  | 0.5656  |
| BC032469  | 0.4395 | 0.1759  | 0.0037# | 0.0298# | 0.0336# |
| POU3F3    | 0.4214 | 0.3585  | 0.0221# | 0.0196# | 0.3106  |
| UCA1      | 0.5929 | 0.5419  | 0.0590  | 0.0314# | 0.5187  |
| NEAT1     | 0.8436 | 0.3376  | 0.3673  | 0.5357  | 0.6325  |
| FALEC     | 0.7534 | 0.1535  | 0.0467# | 0.0304# | 0.4812  |
| LINCRROR  | 0.7534 | 0.1743  | 0.0157# | 0.0981  | 0.2437  |

# P value with statistical significance.

**Supplementary Table 19: List of primers used for lncRNA expression profiling**

| <b>Genes</b>                         | <b>Primer sequences</b>                                         |
|--------------------------------------|-----------------------------------------------------------------|
| AP5M1 - Fwd                          | 5' - TCTCACGAACCTCAAACTTCAT - 3'                                |
| CCAT1 - Fwd                          | 5' - GTGTATCTTAGTTCAACCAAATTGTAATCATCTG - 3'                    |
| FALEC - Fwd                          | 5' - CTGCACTCTACACTAGCAGCCT - 3'                                |
| GAS5 - Fwd                           | 5' - TGCCTGATGGAGTCTCATGGCACA - 3'                              |
| H19 - Fwd - Fwd                      | 5' - AGGGCTTCAGCAGGAGCCCTGG - 3'                                |
| HOTAIR - Fwd                         | 5' - CTTGTGTAGGTTGTGTGTGTGTGGTGG - 3'                           |
| LINC00312 - Fwd                      | 5' - AGTGGCACAGCTCATCTTGAAGT - 3'                               |
| LINCOROR - Fwd                       | 5' - GCAGCTGTTACGGGAAACGGTA - 3'                                |
| MALAT1 - Fwd                         | 5' - CTGGTGTTTTGAGAAGCCCTACTGCTG - 3'                           |
| MEG3 - Fwd                           | 5' - GGCGCACCCCACTGTGCTCTC - 3'                                 |
| NBAT1 - Fwd                          | 5' - TGCTCCACCCATTTGTAAGCAGA - 3'                               |
| NEAT1 - Fwd                          | 5' - TCTTCTTCCCCTTTACAGCACAAAT - 3'                             |
| PANDA - Fwd                          | 5' - GATCTGTCTGCCTCGGTCTC - 3'                                  |
| POU3F3 - Fwd                         | 5' - CAGTTGTCACCTGCAAAGACCTCTG - 3'                             |
| PTENP1-AS - Fwd                      | 5' - TGGCTTCTTGCCAGAGCTGTGCT - 3'                               |
| TUG1 - Fwd                           | 5' - GGCCGAGCGAACATGAAACTTTCAACT - 3'                           |
| UCA1 - Fwd                           | 5' - GCGTTTCATGTGGTTTTTCCTTTCCT - 3'                            |
| ZEB2-AS1 - Fwd                       | 5' - TGTGCATGATGAATTTCTGGACTGGA - 3'                            |
| BC032469 - Fwd                       | 5' - CGAGCCGGCAGTGGCAAACC - 3'                                  |
| GAPDH - Fwd                          | 5' - GAAGAGGGGAGGGGCCTAGG - 3'                                  |
| Universal cDNA Reverse primer        | 5' - CAGTGCAGGGTCCGAGGTACAGAGC<br>CACCTGGGCAATTTTTTTTTTTVN - 3' |
| Universal RT Reverse primer - lncRNA | 5' - CAG TGC AGG GTC CGA GGT - 3'                               |

3' Wobble bases: V- [A,C,G], N- [A,C,G,T]

**Supplementary Table 20: List of stem loop and forward primers used for miRNA expression analysis**

| <b>Genes</b>                                      | <b>Primer sequences (5'–3')</b>                                                                                      |
|---------------------------------------------------|----------------------------------------------------------------------------------------------------------------------|
| miR-21                                            | Stemloop - GTCGTATCCAGTGCGTGCGAGTGACACGCAGAGCCACCTGGGCAATTTGCA<br>CTGGATACGACTCAACA<br>Fwd - GCCCCTAGCTTATCAGACTGATG |
| miR-145                                           | Stemloop - GTCGTATCCAGTGCGTGCGAGTGACACGAGAGCCACCTGGGCAATTTGCAC<br>TGGATACGACAGGGAT<br>Fwd - GTCCAGTTTTCCAGGAATC      |
| miR-148a                                          | Stemloop - GTCGTATCCAGTGCGTGCGAGTGACACGAGAGCCACCTGGGCAATTTGCAC<br>TGGATACGACACAAAG<br>Fwd - CAGTCAGTGCCTACAGAACT     |
| RNU44                                             | Stemloop – GTCGTATCCAGTGCGTGCGAGTGACACGAGAGCCACCTGGGCA<br>ATTTGCACTGGATACGACAGTCAG<br>Fwd - GCAAATGCTGACTGAACATGA    |
| Universal RT Reverse<br>primer – miRNA/<br>snoRNA | TCGTATCCAGTGCGTGCGAGT                                                                                                |
